# Supplementary material
Source: publisher figshare collection journal article supplement (https://tandf.figshare.com/ndownloader/files/13023689)
Supplement: Supplementary file 1 [file 13023689]

**Supplementary material to:**

**Application of an optical disdrometer to characterize simulated rainfall and measure drop-size distribution**

Derege Tsegaye Meshesha1,*, Atsushi Tsunekawa2, Nigussie Haregeweyn2,3

**Figure S1.** A fitting curve between flow rate and intensity (RS calibration).

**Figure S2.** Volume of water contributed by the different spectrum of drop size and rainfall intensity.
